# Supplementary material
Source: PubMed Central journal article supplement (PMC3571394)
Supplement: JVI.03061-12_zjv999097312so2.pdf [file JVI.03061-12_zjv999097312so2.pdf]

### **Supplementary figure legend**

**FIG. S1.** 3D movie of BCBL1 reveals the presence of endogenously expressed perinuclear and cytoplasmic LANA1 isoforms. BCBL1 cells were stained with mouse  $\alpha$ CR2 antibody for 1 hr at room temperature followed by secondary antibody (mouse Alexa Fluor 488). The cells were subsequently stained with DRAQ5 (blue) and mounted with gelvatol mounting medium for fluorescence. 3D image stacks of BCBL1 cells were acquired using a Leica TCS SP confocal microscope (Leica confocal software).
